# Supplementary material for: A Highly Sensitive Ammonia Gas Sensor Using Micrometer-Sized Core–Shell-Type Spherical Polyaniline Particles
Source: MDPI journal article supplement (doi:10.3390/s21227522), 2021-11-12
Supplement: s1 [file s1]

# Supplementary Materials

## Highly Sensitive Ammonia Gas Sensor Using Micrometer-Sized Core-Shell Type Spherical Polyaniline Particles

Masanobu Matsuguchi\*, Tomoki Nakamae, Ryoya Fujisada, and Shunsuke Shiba

Department of Materials Science and Biotechnology, Graduate School of Science and Engineering, Ehime University,  
Bunkyo-cho 3, Matsuyama, Ehime 790-8577, Japan; matsuguchi.masanobu.mm@ehime-u.ac.jp

\* Correspondence: matsuguchi.masanobu.mm@ehime-u.ac.jp; Tel.: +81-89-927-9933

---

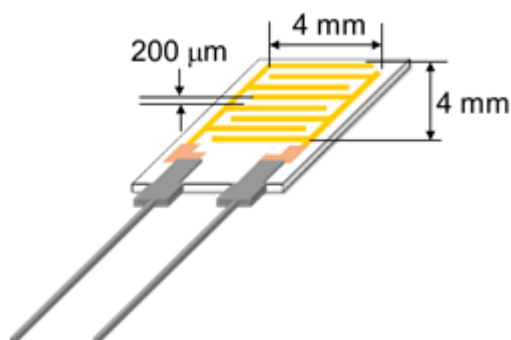

**Figure S1.** Illustration of an alumina substrate having a pair of interdigitated gold electrodes.

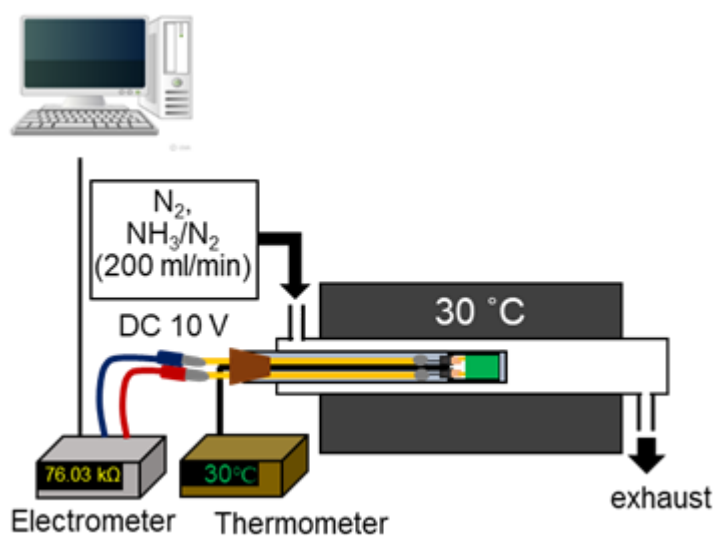

**Figure S2.** Experimental setup used for NH<sub>3</sub> gas sensing measurement.

Low conductivity

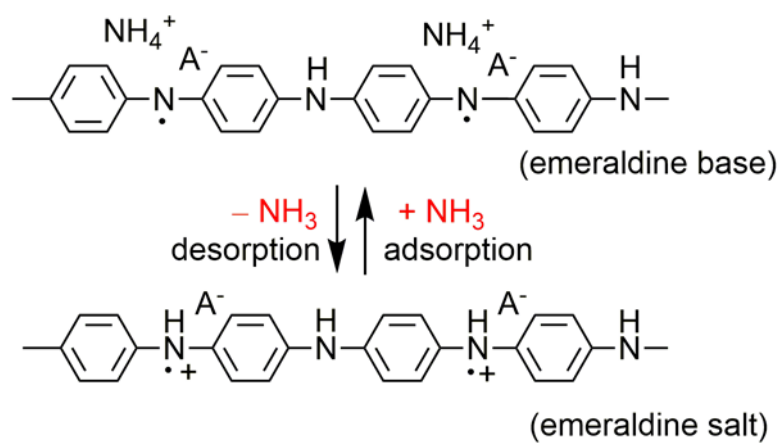

High conductivity

**Figure S3.** Sensing mechanism of PANI-based  $\text{NH}_3$  gas sensors.
